# Supplementary material for: Psychometric Analysis of the Spanish Version of the Évaluation du Vécu de l’Anesthésie Générale EVAN-G Questionnaire in Adult Surgical Patients in Argentina: A Cross- Sectional Study
Source: Research Square preprint supplement (doi:10.21203/rs.3.rs-5827795/v1), 2025-01-20
Supplement: Supplementary file 1 [file 278b2a66a49e92e47477890a.docx]

Supplementary appendix

**Table 1:** Factor Loadings, Error Variances for Each Item, and Average Variance Extracted and Composite Reliability for Each DimensionHair JF, Black WC, Babin BJ, Anderson RE. *Multivariate Data Analysis*. 8th ed. Cengage Learning EMEA; 2018.

| Dimension | Item | Factorial Load (λ) | Error Variance (θ) | Average Variance Extracted | Composite Reliability |
| --- | --- | --- | --- | --- | --- |
| Information | 1 | 0.84 | 0.29 | 0.70 | 0.92 |
| 2 | 0.87 | 0.25 |
| 3 | 0.88 | 0.21 |
| 4 | 0.76 | 0.42 |
| 5 | 0.84 | 0.29 |
| Privacy | 6 | 0.87 | 0.25 | 0.59 | 0.85 |
| 8 | 0.75 | 0.43 |
| 18 | 0.71 | 0.50 |
| 19 | 0.75 | 0.44 |
| Discomfort | 7 | 0.65 | 0.58 | 0.51 | 0.84 |
| 9 | 0.70 | 0.51 |
| 10 | 0.70 | 0.50 |
| 13 | 0.74 | 0.45 |
| 14 | 0.78 | 0.39 |
| Wait | 20 | 0.79 | 0.32 | 0.75 | 0.92 |
| 21 | 0.91 | 0.25 |
| 22 | 0.82 | 0.19 |
| 23 | 0.88 | 0.22 |
| Attention | 24 | 0.87 | 0.24 | 0.76 | 0.96 |
| 25 | 0.79 | 0.37 |
| 26 | 0.82 | 0.33 |
| 27 | 0.93 | 0.14 |
| 28 | 0.90 | 0.18 |
| 29 | 0.93 | 0.14 |
| 30 | 0.85 | 0.27 |
| Pain | 11 | 0.40 | 0.84 | 0.27 | 0.63 |
| 12 | 0.73 | 0.47 |
| 15 | 0.57 | 0.67 |
| 16 | 0.48 | 0.77 |
| 17 | 0.30 | 0.91 |
